# Supplementary material for: DNA Methylation Profiling of Breast Cancer Cell Lines along the Epithelial Mesenchymal Spectrum—Implications for the Choice of Circulating Tumour DNA Methylation Markers
Source: MDPI journal article supplement (doi:10.3390/ijms19092553), 2018-08-28
Supplement: s1 [file s1]

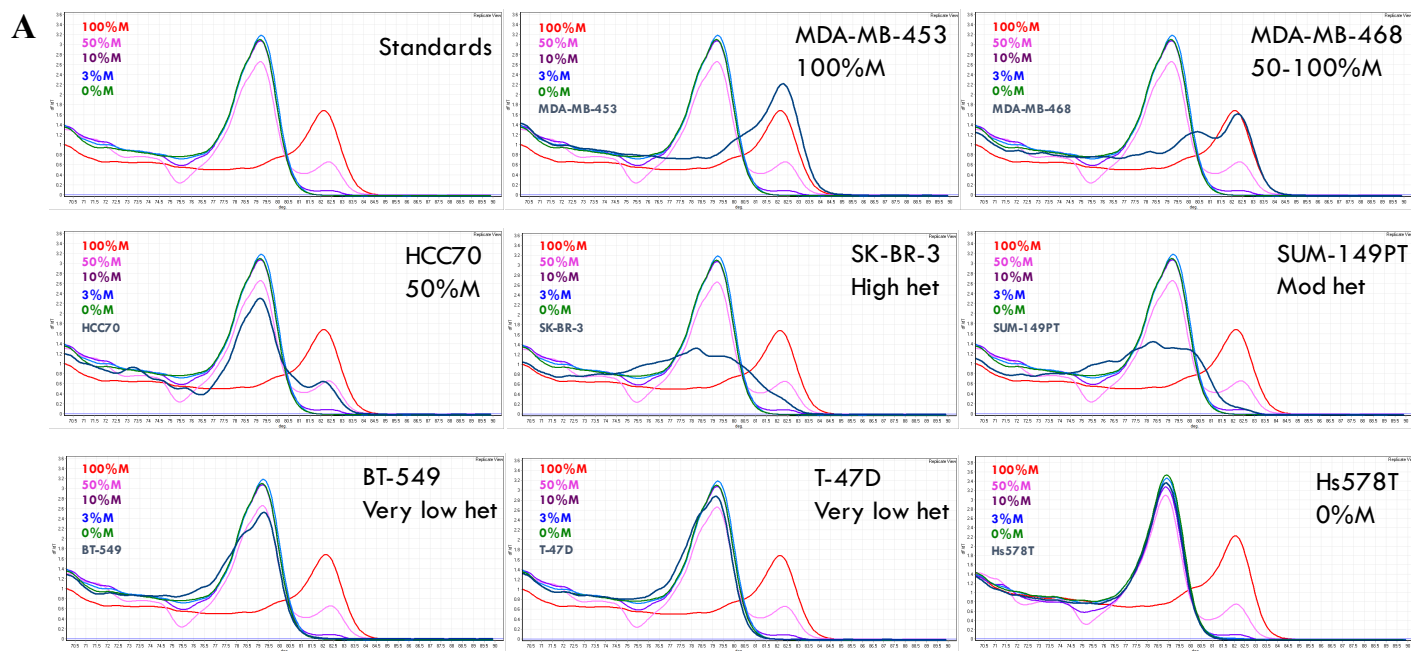

**B**

| CpG positions<br>Samples | Status by MSHRM<br>(confirmed by Pyrosequencing) | % of methylated allele |    |    |    |
|--------------------------|--------------------------------------------------|------------------------|----|----|----|
|                          |                                                  | 1                      | 2  | 3  | 4  |
| 100%M Std                |                                                  | 94                     | 96 | 96 | 96 |
| 50%M Std                 |                                                  | 31                     | 33 | 34 | 33 |
| 10%M Std                 |                                                  | 9                      | 9  | 8  | 9  |
| 0%M Std                  |                                                  | 1                      | 1  | 1  | 2  |
| MDA-MB-453               | 100%M ✓                                          | 97                     | 96 | 97 | 98 |
| MDA-MB-468               | 50-100%M ✓                                       | 84                     | 89 | 90 | 96 |
| HCC70                    | 50%M ✓                                           | 48                     | 50 | 48 | 50 |
| SK-BR-3                  | high het ✓                                       | 65                     | 50 | 50 | 78 |
| SUM-149PT                | mod het ✓                                        | 32                     | 28 | 28 | 85 |
| BT-549                   | very low het ✓                                   | 7                      | 5  | 6  | 5  |
| T-47D                    | very low het ✓                                   | 2                      | 2  | 3  | 4  |
| Hs578T                   | 0%M ✓                                            | 2                      | 2  | 2  | 2  |

90-100

80-89

50-79

20-49

10-19

0-9

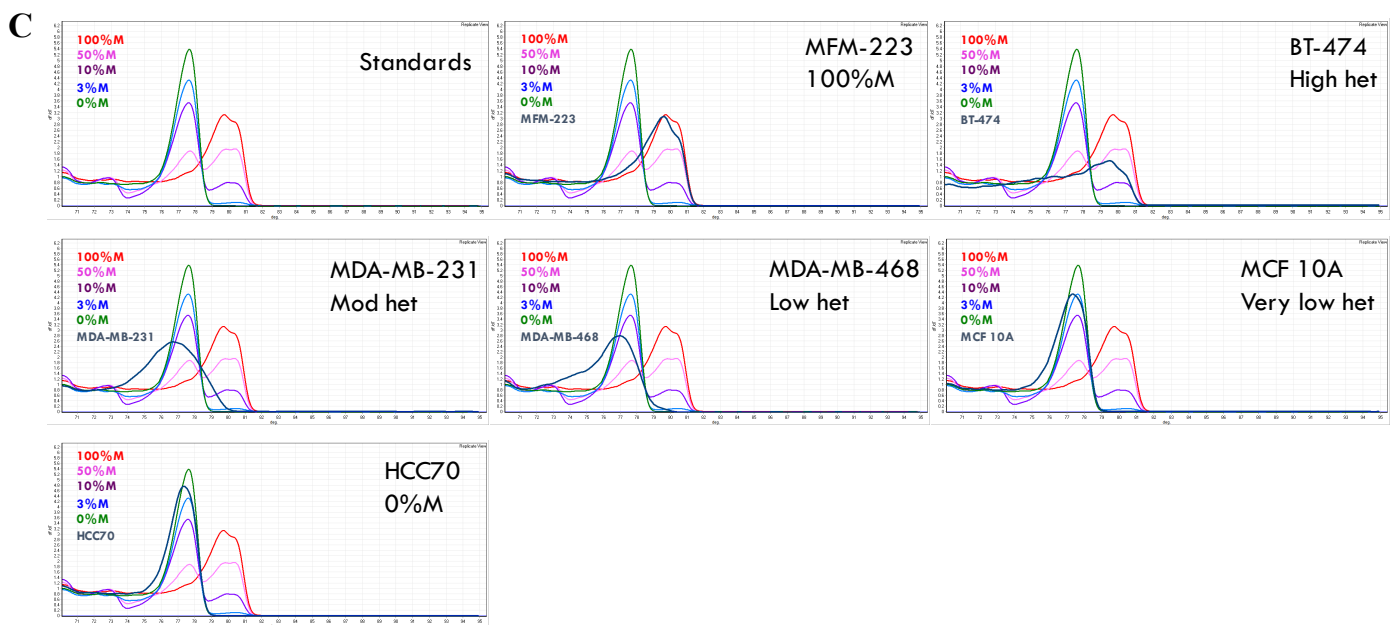

**D**

| CpG positions<br>Samples | Status by MSHRM<br>(confirmed by Pyrosequencing) | % of methylated allele |    |    |    |    |    |    |    |    |    |
|--------------------------|--------------------------------------------------|------------------------|----|----|----|----|----|----|----|----|----|
|                          |                                                  | 1                      | 2  | 3  | 4  | 5  | 6  | 7  | 8  | 9  | 10 |
| 100%M Std                |                                                  | 93                     | 90 | 83 | 95 | 93 | 81 | 97 | 96 | 91 | 86 |
| 50%M Std                 |                                                  | 76                     | 82 | 71 | 78 | 74 | 74 | 75 | 72 | 81 | 78 |
| 10%M Std                 |                                                  | 35                     | 37 | 36 | 38 | 39 | 35 | 36 | 41 | 39 | 32 |
| 0%M Std                  |                                                  | 4                      | 3  | 5  | 4  | 3  | 0  | 3  | 0  | 4  | 0  |
| MFM-223                  | 100%M ✓                                          | 92                     | 93 | 84 | 90 | 86 | 86 | 87 | 99 | 96 | 88 |
| BT-474                   | high het ✓                                       | 83                     | 74 | 72 | 78 | 84 | 63 | 78 | 84 | 77 | 53 |
| MDA-MB-231               | mod het ✓                                        | 89                     | 58 | 75 | 18 | 15 | 6  | 18 | 46 | 37 | 64 |
| MDA-MB-468               | low het ✓                                        | 26                     | 23 | 18 | 17 | 14 | 7  | 15 | 36 | 22 | 46 |
| MCF 10A                  | very low het ✓                                   | 5                      | 3  | 7  | 2  | 2  | 0  | 3  | 7  | 6  | 5  |
| HCC70                    | 0%M ✓                                            | 3                      | 7  | 6  | 2  | 6  | 3  | 0  | 12 | 4  | 5  |

90-100

80-89

50-79

20-49

10-19

0-9

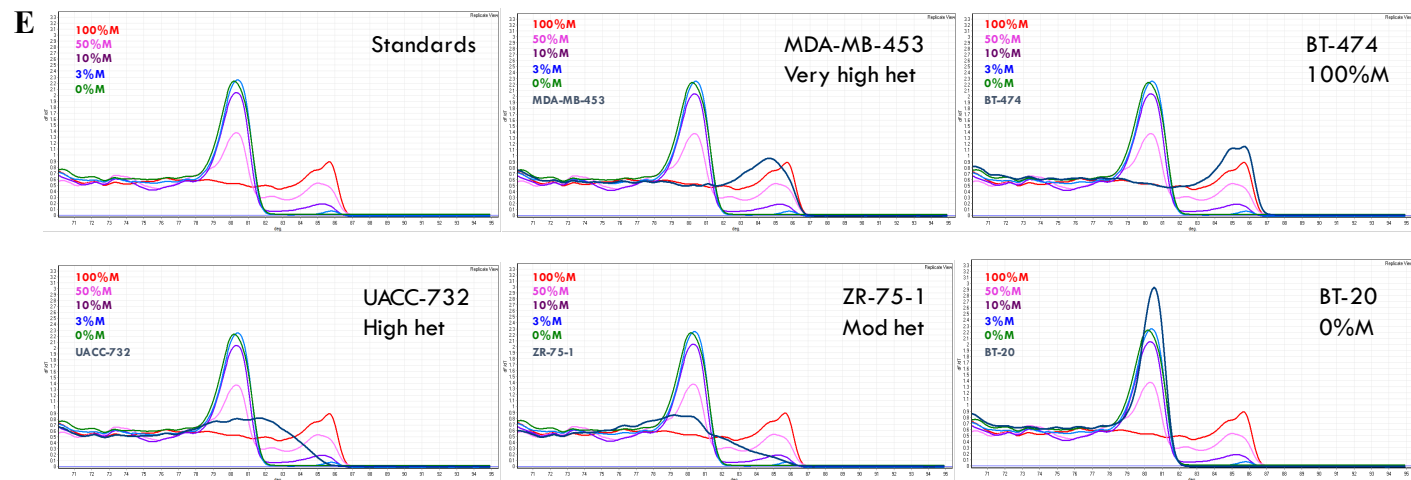

**F**

| CpG positions<br>Samples | Status by MSHRM<br>(confirmed by Pyrosequencing) | % of methylated allele |    |    |    |    |    |    |     |    |    |    |    |
|--------------------------|--------------------------------------------------|------------------------|----|----|----|----|----|----|-----|----|----|----|----|
|                          |                                                  | 1                      | 2  | 3  | 4  | 5  | 6  | 7  | 8   | 9  | 10 | 11 | 12 |
| 100%M Std                |                                                  | 84                     | 82 | 89 | 80 | 89 | 84 | 81 | 84  | 78 | 83 | 78 | 79 |
| 50%M Std                 |                                                  | 50                     | 45 | 47 | 47 | 50 | 50 | 45 | 45  | 41 | 44 | 42 | 46 |
| 10%M Std                 |                                                  | 19                     | 18 | 19 | 19 | 16 | 19 | 10 | 19  | 17 | 14 | 17 | 20 |
| 0%M Std                  |                                                  | 6                      | 0  | 2  | 2  | 2  | 0  | 0  | 0   | 0  | 3  | 0  | 13 |
| MDA-MB-453               | very high het ✓                                  | 95                     | 93 | 96 | 97 | 95 | 94 | 91 | 91  | 84 | 95 | 85 | 91 |
| BT-474                   | 100%M ✓                                          | 96                     | 95 | 96 | 97 | 96 | 95 | 97 | 100 | 90 | 95 | 83 | 89 |
| UACC-732                 | high het ✓                                       | 97                     | 89 | 93 | 90 | 94 | 96 | 28 | 44  | 33 | 60 | 55 | 64 |
| ZR-75-1                  | mod het ✓                                        | 68                     | 41 | 42 | 50 | 55 | 61 | 66 | 34  | 48 | 65 | 59 | 46 |
| BT-20                    | 0%M ✓                                            | 2                      | 2  | 2  | 2  | 1  | 1  | 2  | 2   | 2  | 1  | 0  | 2  |

90-100

80-89

50-79

20-49

10-19

0-9

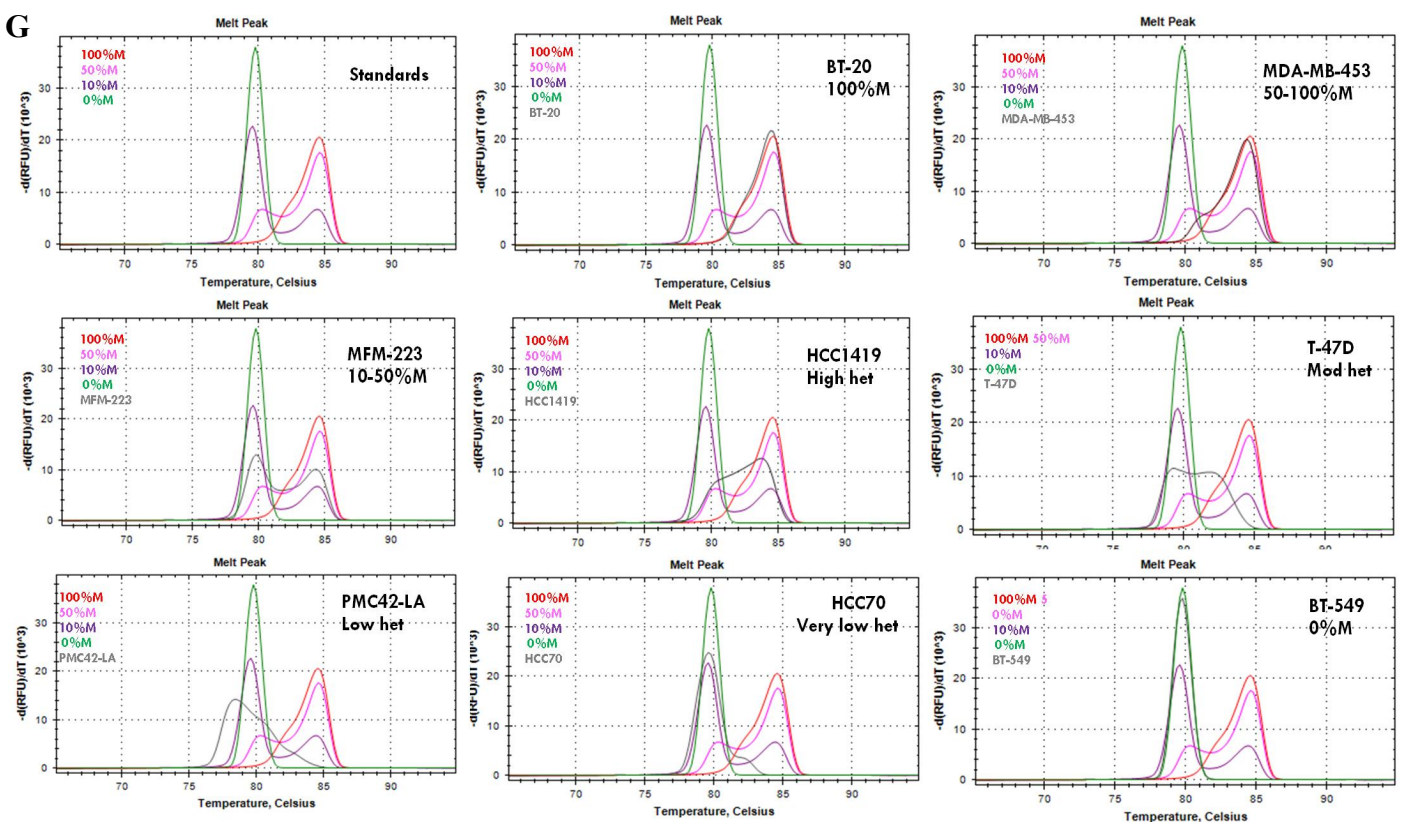

H

| CpG positions<br>Samples | Status by MSHRM<br>(confirmed by<br>Pyrosequencing) | % of methylated allele |    |    |     |    |    |    |    |     |     |    |     |     |     |    |    |    |
|--------------------------|-----------------------------------------------------|------------------------|----|----|-----|----|----|----|----|-----|-----|----|-----|-----|-----|----|----|----|
|                          |                                                     | 1                      | 2  | 3  | 4   | 5  | 6  | 7  | 8  | 9   | 10  | 11 | 12  | 13  | 14  | 15 | 16 | 17 |
| 100%M Std                |                                                     | 85                     | 97 | 94 | 100 | 92 | 81 | 89 | 84 | 100 | 100 | 79 | 97  | 100 | 100 | 64 | 93 | 87 |
| 50%M Std                 |                                                     | 71                     | 74 | 74 | 79  | 72 | 69 | 68 | 66 | 79  | 80  | 63 | 88  | 81  | 87  | 48 | 70 | 65 |
| 10%M Std                 |                                                     | 27                     | 36 | 29 | 34  | 32 | 28 | 28 | 23 | 34  | 30  | 23 | 32  | 33  | 38  | 20 | 23 | 31 |
| 0%M Std                  |                                                     | 3                      | 7  | 4  | 3   | 3  | 0  | 0  | 3  | 5   | 4   | 0  | 4   | 4   | 0   | 0  | 4  | 3  |
| BT-20                    | 100%M ✓                                             | 73                     | 70 | 90 | 100 | 95 | 88 | 89 | 85 | 94  | 100 | 80 | 96  | 96  | 100 | 68 | 83 | 78 |
| MDA-MB-453               | 50-100%M ✓                                          | 69                     | 55 | 87 | 94  | 94 | 84 | 89 | 82 | 98  | 100 | 85 | 100 | 100 | 100 | 74 | 93 | 82 |
| MFM-223                  | 10-50%M ✓                                           | 47                     | 54 | 48 | 54  | 52 | 48 | 45 | 42 | 49  | 57  | 43 | 51  | 66  | 97  | 43 | 55 | 51 |
| HCC1419                  | High het ✓                                          | 30                     | 24 | 75 | 82  | 55 | 60 | 65 | 77 | 77  | 96  | 69 | 98  | 97  | 97  | 70 | 98 | 89 |
| T-47D                    | Mod het ✓                                           | 58                     | 7  | 22 | 34  | 29 | 25 | 28 | 52 | 43  | 66  | 49 | 37  | 74  | 100 | 55 | 81 | 84 |
| PMC42-LA                 | low het ✓                                           | 9                      | 7  | 8  | 16  | 19 | 14 | 18 | 38 | 33  | 47  | 24 | 37  | 54  | 78  | 30 | 35 | 31 |
| HCC70                    | very low het ✓                                      | 7                      | 8  | 6  | 4   | 10 | 3  | 3  | 22 | 12  | 27  | 14 | 12  | 14  | 24  | 15 | 24 | 22 |
| BT-549                   | 0%M ✓                                               | 0                      | 5  | 3  | 6   | 0  | 3  | 4  | 7  | 3   | 0   | 3  | 3   | 0   | 0   | 0  | 4  | 0  |

I

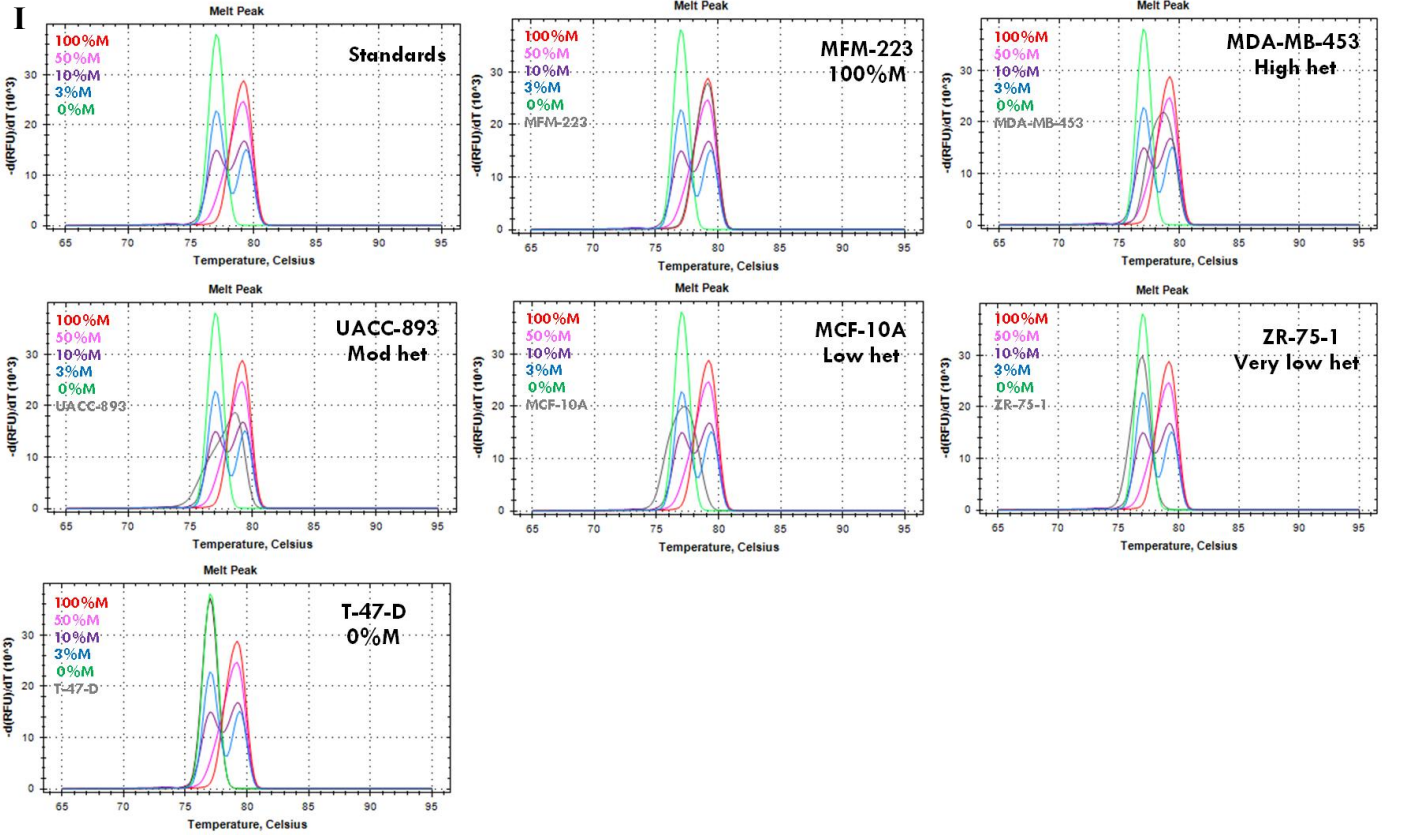

J

| CpG positions<br>Samples | Status by MSHRM<br>(confirmed by<br>Pyrosequencing) | % of methylated allele |    |    |    |    |    |    |    |
|--------------------------|-----------------------------------------------------|------------------------|----|----|----|----|----|----|----|
|                          |                                                     | 1                      | 2  | 3  | 4  | 5  | 6  | 7  | 8  |
| 100%M Std                |                                                     | 100                    | 98 | 89 | 89 | 74 | 88 | 85 | 75 |
| 50%M Std                 |                                                     | 96                     | 95 | 85 | 88 | 78 | 91 | 83 | 77 |
| 10%M Std                 |                                                     | 59                     | 55 | 52 | 53 | 44 | 51 | 45 | 42 |
| 3%M Std                  |                                                     | 38                     | 36 | 33 | 35 | 27 | 34 | 32 | 30 |
| 0%M Std                  |                                                     | 1                      | 2  | 0  | 1  | 0  | 4  | 5  | 0  |
| MFM-223                  | 100%M ✓                                             | 97                     | 99 | 89 | 91 | 66 | 92 | 88 | 79 |
| MDA-MB-453               | high het ✓                                          | 75                     | 79 | 88 | 91 | 62 | 80 | 85 | 75 |
| UACC-893                 | mod het ✓                                           | 30                     | 36 | 80 | 78 | 53 | 87 | 78 | 69 |
| MCF 10A                  | low het ✓                                           | 7                      | 12 | 24 | 54 | 31 | 30 | 59 | 51 |
| ZR-75-1                  | very low het ✓                                      | 5                      | 2  | 6  | 15 | 3  | 17 | 15 | 6  |
| T-47D                    | 0%M ✓                                               | 0                      | 2  | 12 | 5  | 1  | 2  | 2  | 2  |
